# Supplementary material for: Valorization of coffee bean waste: a coffee bean waste derived multifunctional catalyst for photocatalytic hydrogen production and electrocatalytic oxygen reduction reactions
Source: Royal Society of Chemistry journal article supplement (doi:10.1039/c6ra14907c), 2016-01-01
Supplement: c6ra14907c1.pdf [file c6ra14907c1.pdf]

## Supplementary Information

# Valorization of Coffee Bean Waste: Coffee Bean Waste Derived Multifunctional Catalyst for Photocatalytic Hydrogen Production and Electrocatalytic Oxygen Reduction Reactions

Sreekuttan M. Unni,<sup>a,d‡</sup> Leena George,<sup>b,c‡</sup> Siddheshwar N. Bhange,<sup>a</sup> R. Nandini

Devi<sup>b,c\*</sup> and Sreekumar Kurungot<sup>a,c\*</sup>

<sup>a)</sup> Physical and Materials Chemistry Division and <sup>b)</sup> Catalysis and Inorganic Chemistry Division, CSIR-National Chemical Laboratory, Pune, Maharashtra, India-411008, E-mail:

[k.sreekumar@ncl.res.in](mailto:k.sreekumar@ncl.res.in); [nr.devi@ncl.res.in](mailto:nr.devi@ncl.res.in)

<sup>c)</sup> Academy of Scientific and Innovative Research (AcSIR), CSIR-National Chemical Laboratory campus, Pune, Maharashtra, India-411008.

<sup>d)</sup> Laboratory for Chemistry and Life Science Institute of Innovative Research, Tokyo Institute of Technology, R1-17, 4259 Nagatsuta, Midori-ku, Japan.

Table S1: The nitrogenous compounds present in the coffee bean.<sup>1</sup>

| <b>Component</b> | <b>Concentration (g/100g)</b> |
|------------------|-------------------------------|
| Protein          | 11-15                         |
| Amino Acid       | 0.8-1.0                       |
| Caffeine         | 1.5-2.0                       |
| Trigonelline     | 0.6-0.7                       |

Table S2: Elemental composition calculated from XPS.

| <b>Element</b> | <b>Atom percentage (%)</b> |            |
|----------------|----------------------------|------------|
|                | <b>p-Cof</b>               | <b>Cof</b> |
| Carbon         | 86.88                      | 77.19      |
| Oxygen         | 10.78                      | 21.31      |
| Nitrogen       | 1.36                       | 1.48       |
| Silicon        | 0.96                       | 0.00       |

Table S3: Different nitrogen contents calculated from XPS.

| <b>Nitrogen content</b> | <b>Atom percentage (%)</b> |            |
|-------------------------|----------------------------|------------|
|                         | <b>p-Cof</b>               | <b>Cof</b> |
| Nitride                 | 0.00                       | 7.67       |
| Pyridinic               | 0.00                       | 17.13      |
| Pyrrolic                | 30.85                      | 36.39      |
| Graphitic               | 29.59                      | 29.89      |
| Oxide                   | 39.56                      | 8.92       |

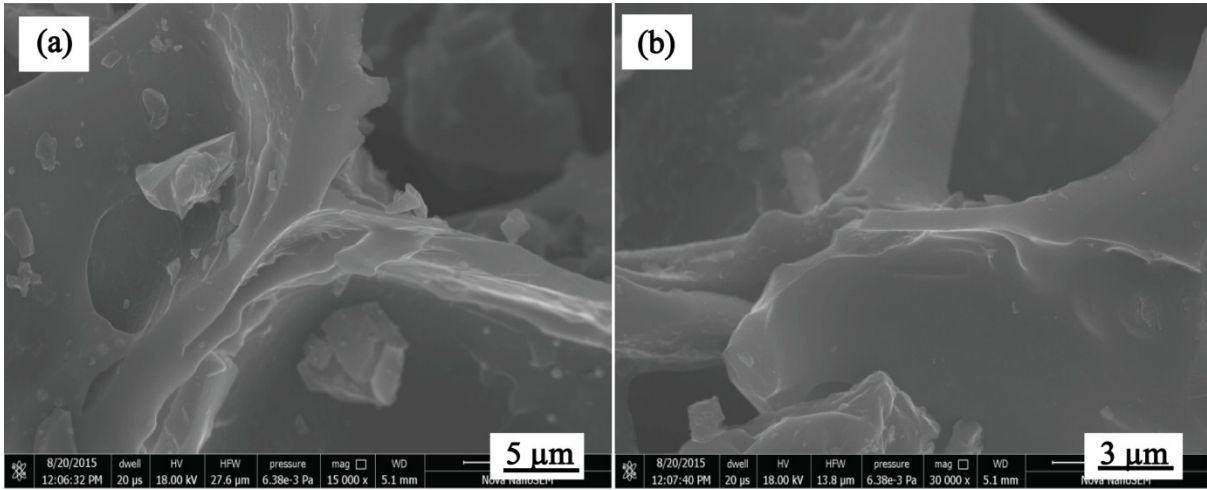

Figure S1. FE-SEM images of Cof at different magnifications (a) 5 μm and (b) 3 μm.

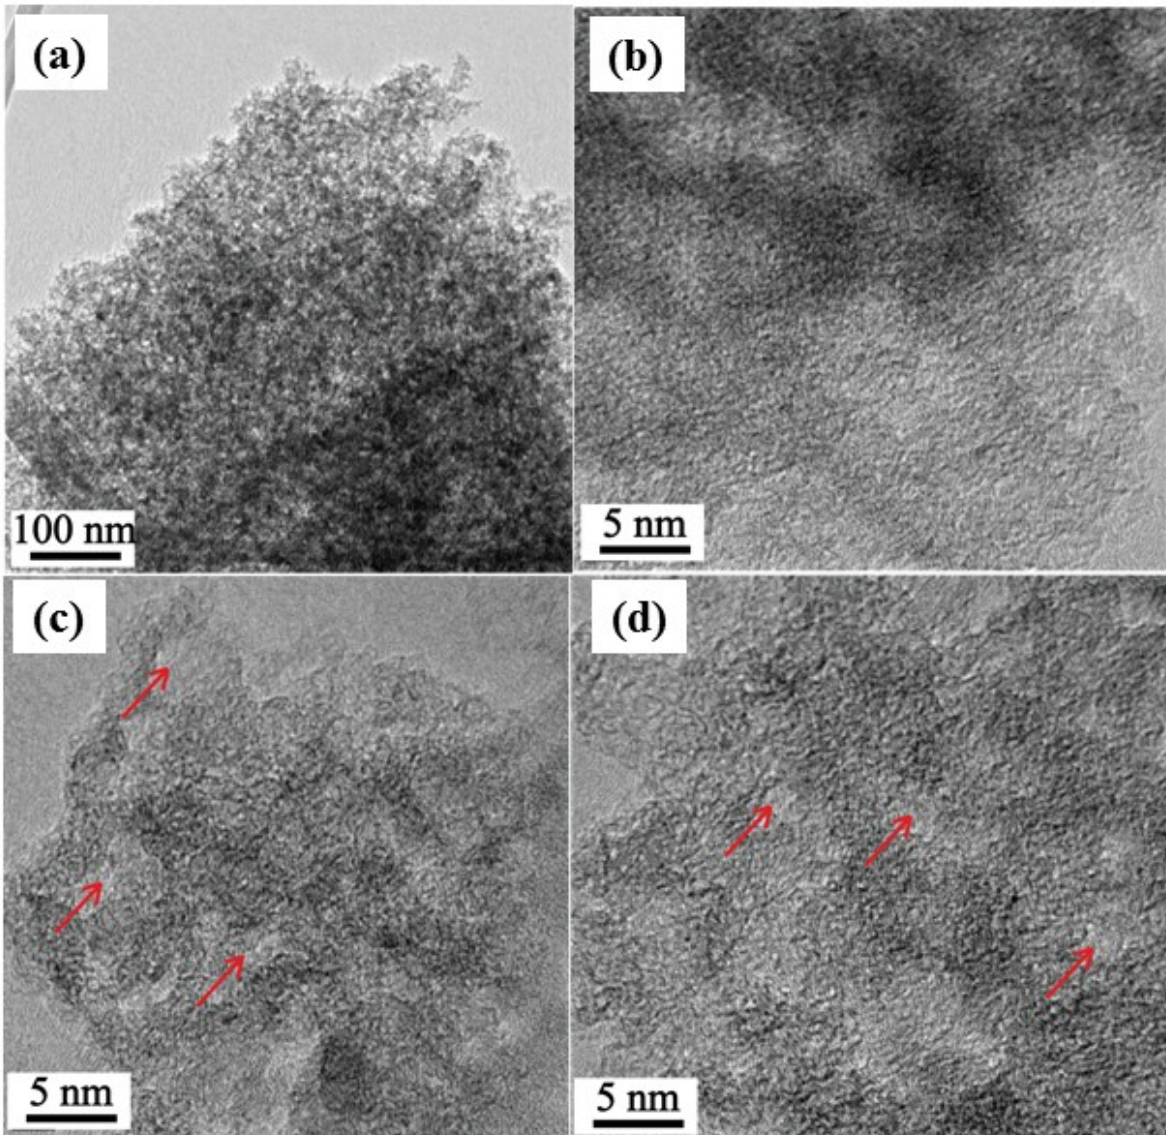

Figure S2. TEM (a) and HR-TEM (b-d) images of p-Cof. The arrows in (c) and (d) indicate the porosity in p-Cof.

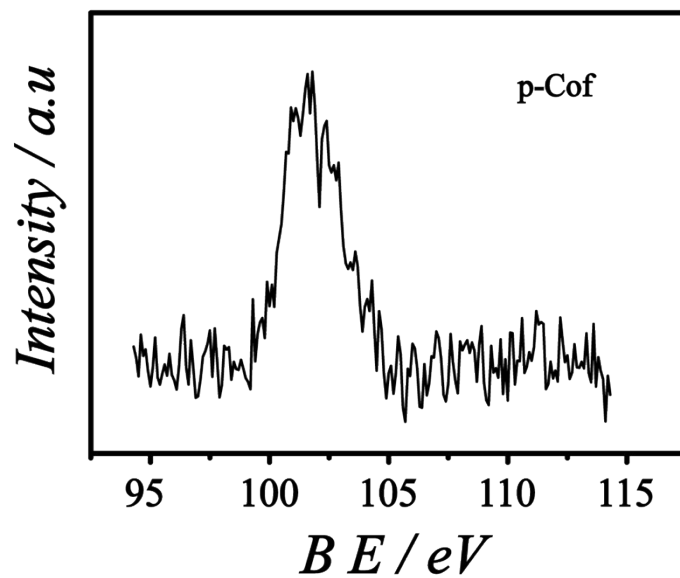

Figure S3. Silicon 2p spectrum of p-Cof.

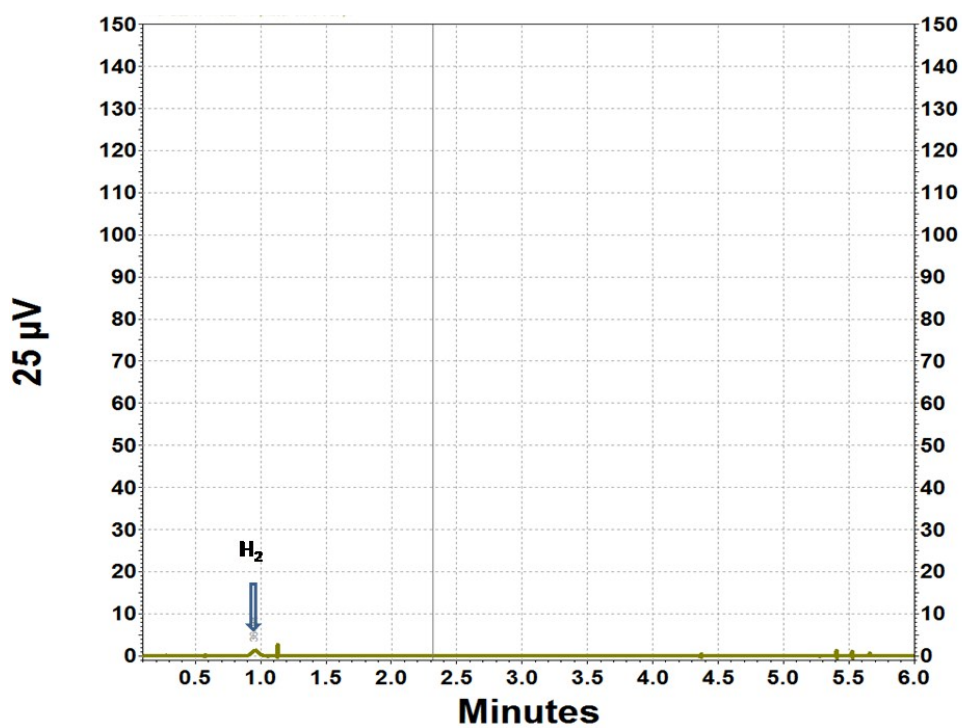

Figure S4. Chromatogram corresponding to the evolved hydrogen by N-AC.

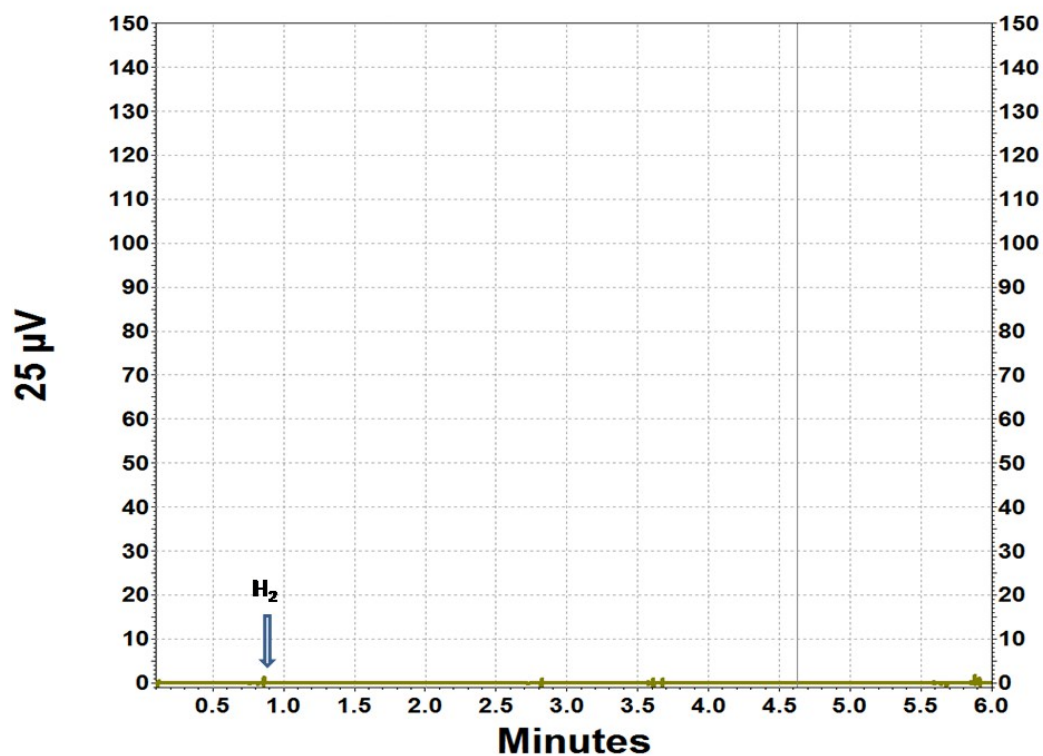

Figure S5. Chromatogram corresponding to the evolved hydrogen by AC.

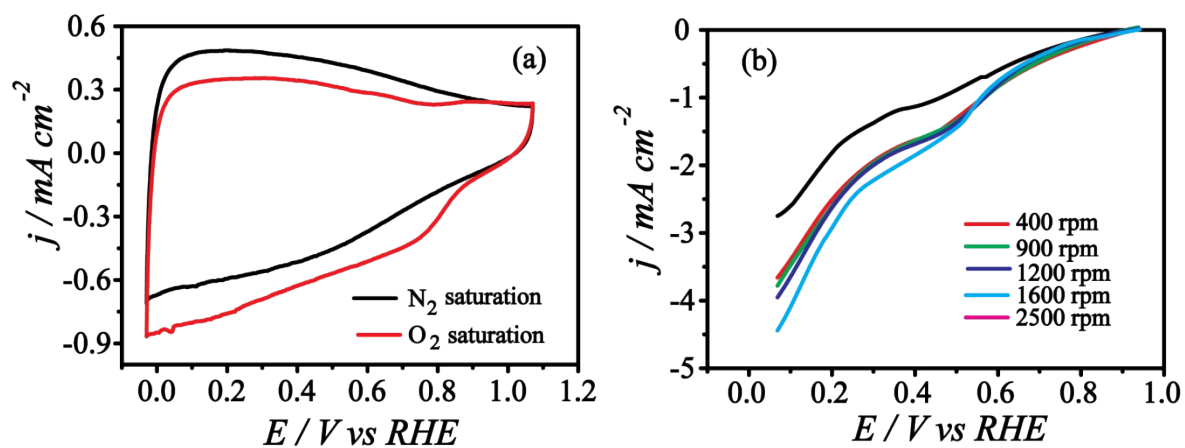

Figure S6. (a) Cyclic voltammograms of Cof in oxygen and nitrogen saturated 0.1 M KOH at a scan rate of 5 mV s<sup>-1</sup> and (b) Linear sweep voltammograms (LSVs) of Cof at different rotation rates in oxygen saturated 0.1 M KOH at a scan rate of 5 mV s<sup>-1</sup>.

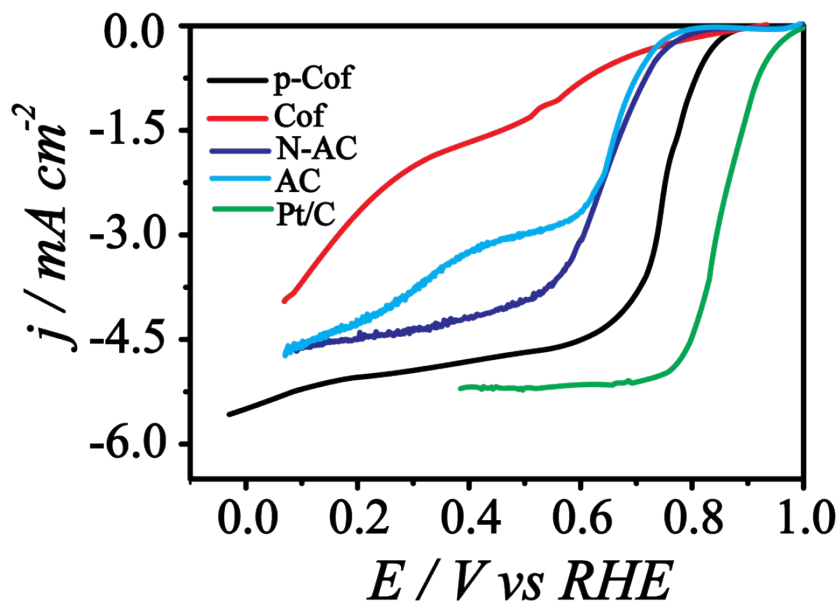

Figure S7. LSVs of p-Cof, Cof, AC and N-AC with an electrode rotation rate of 1600 rpm at a scan rate of  $5 \text{ mV s}^{-1}$  in oxygen saturated  $0.1 \text{ M KOH}$ .

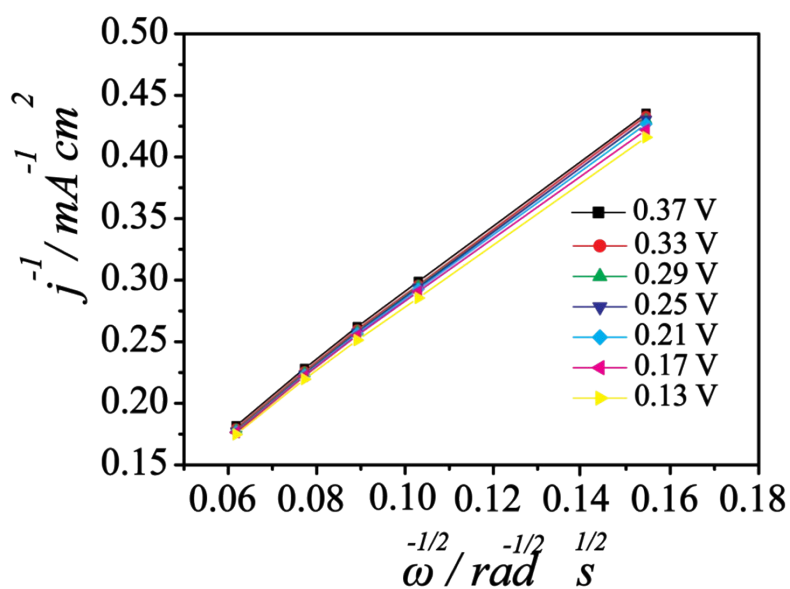

Figure S8. Koutckey – Levich plots of p-Cof derived from linear sweep voltammograms at different rotation rates carried out in oxygen saturated  $0.1 \text{ M KOH}$  at a scan rate of  $5 \text{ mV s}^{-1}$ .

## References

1. Y.-F. Chu, *Coffee: Emerging Health Effects and Disease Prevention*, 2012, John Wiley & Sons, Inc. Blackwell Publishing Ltd.
